# Supplementary material for: Stability of amino acids, free and acyl‐carnitine in stored dried blood spots
Source: PubMed Central journal article supplement — Pediatr Int. 2022 Mar 12;64(1):e15072. doi: 10.1111/ped.15072 (PMC9313883; doi:10.1111/ped.15072), 2022-03-12
Supplement: PED-64-0-s001.pdf [file PED-64-0-s001.pdf]

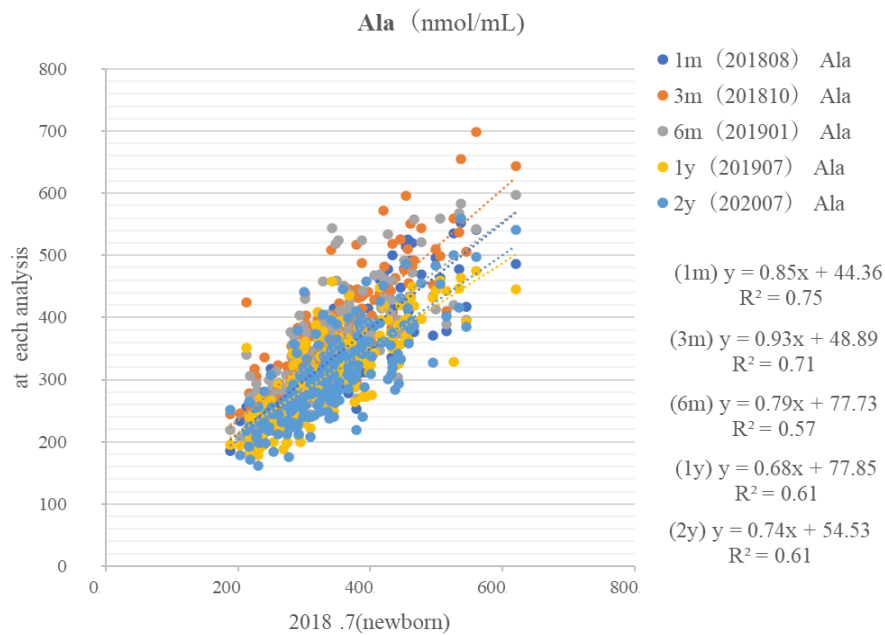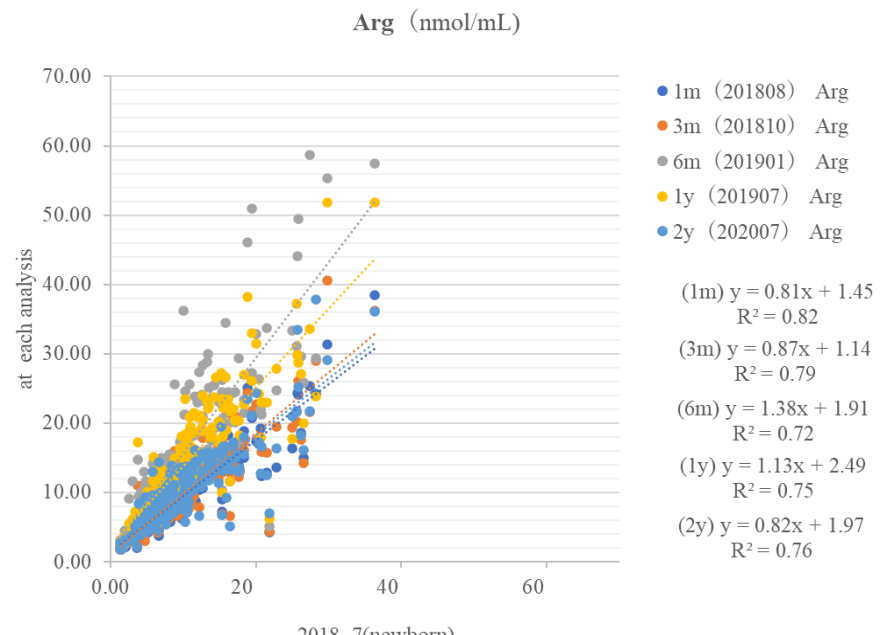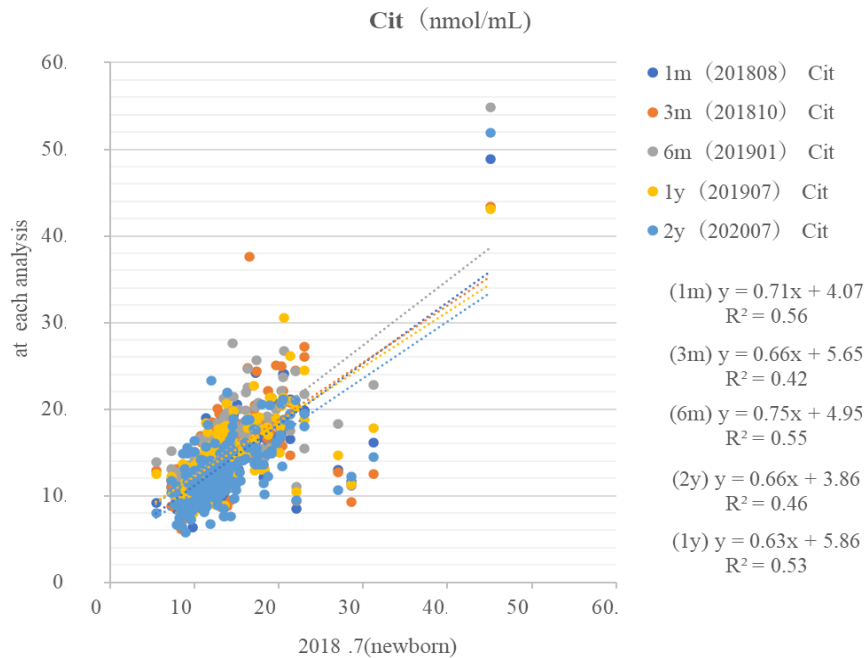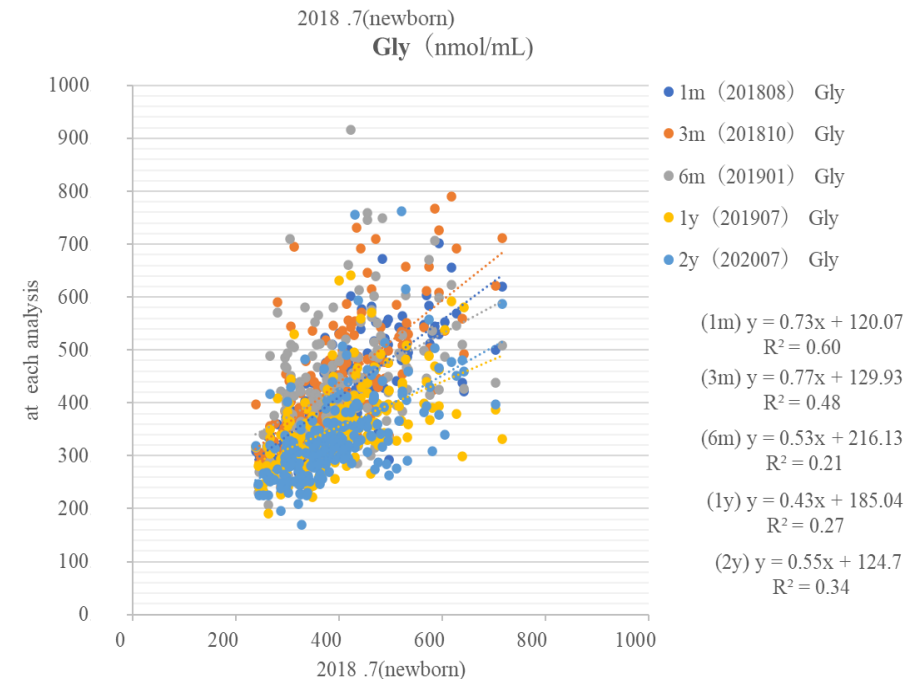

**SUPPLEMENTARY FIGURE 1 (A)**

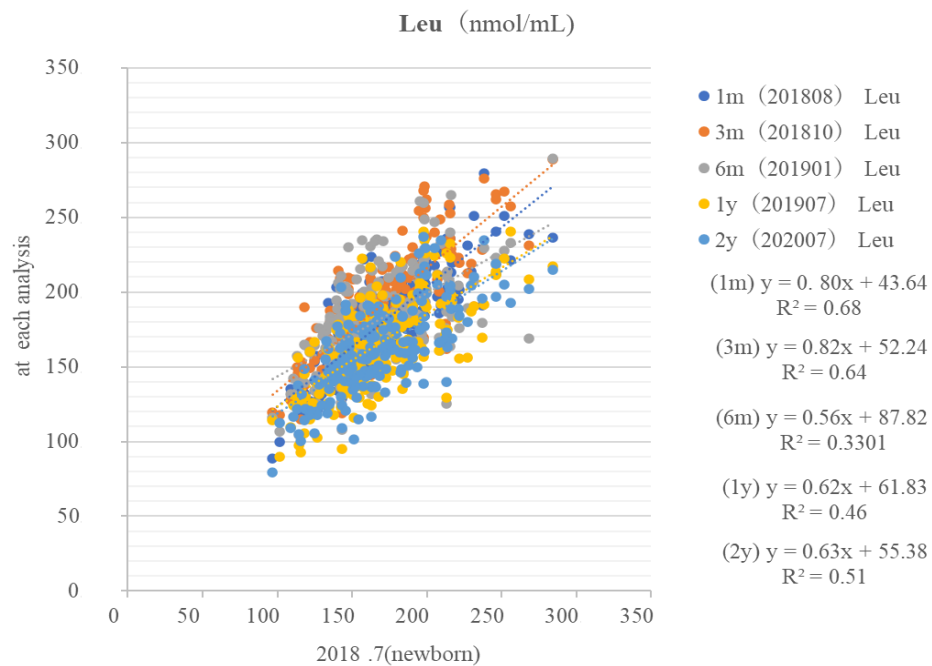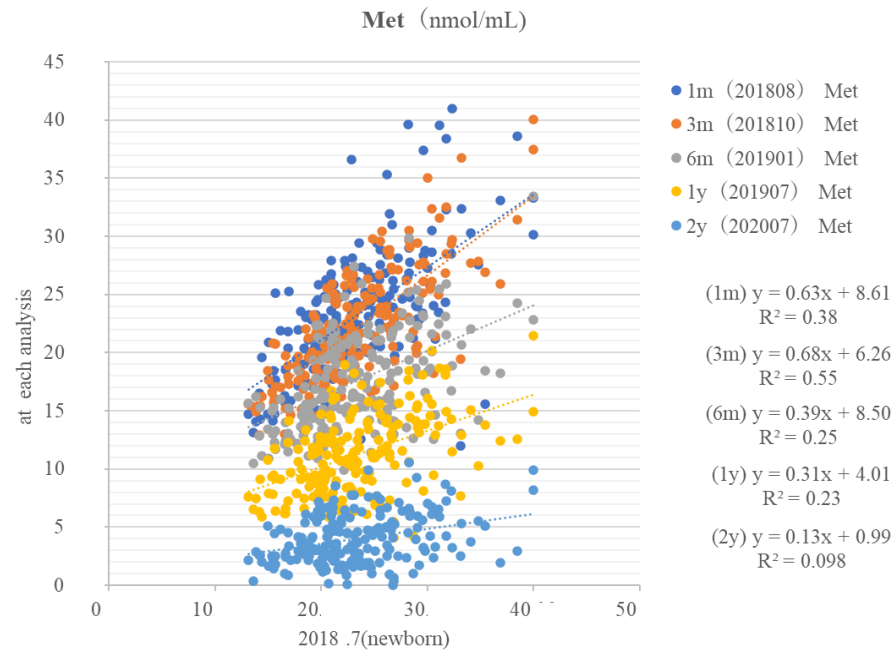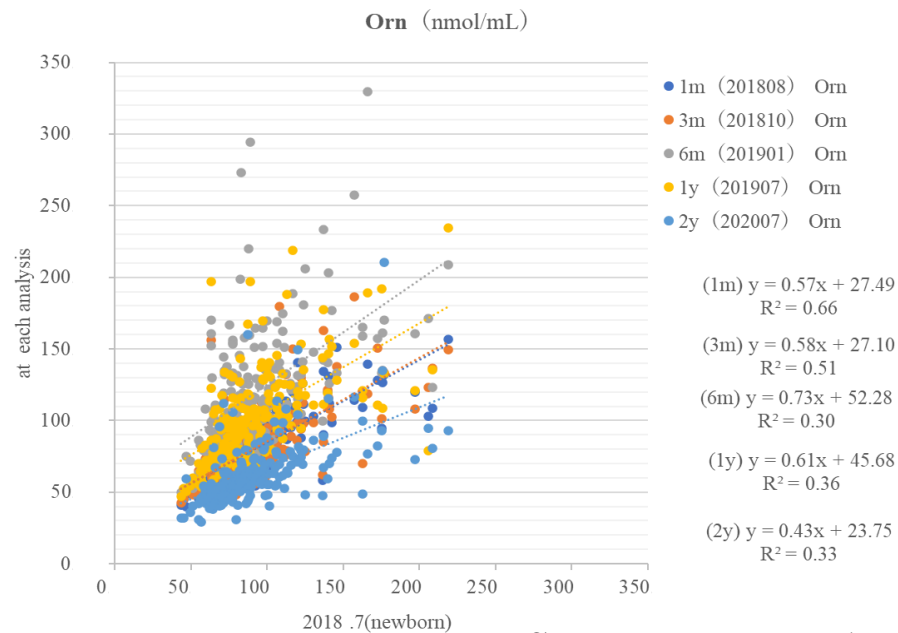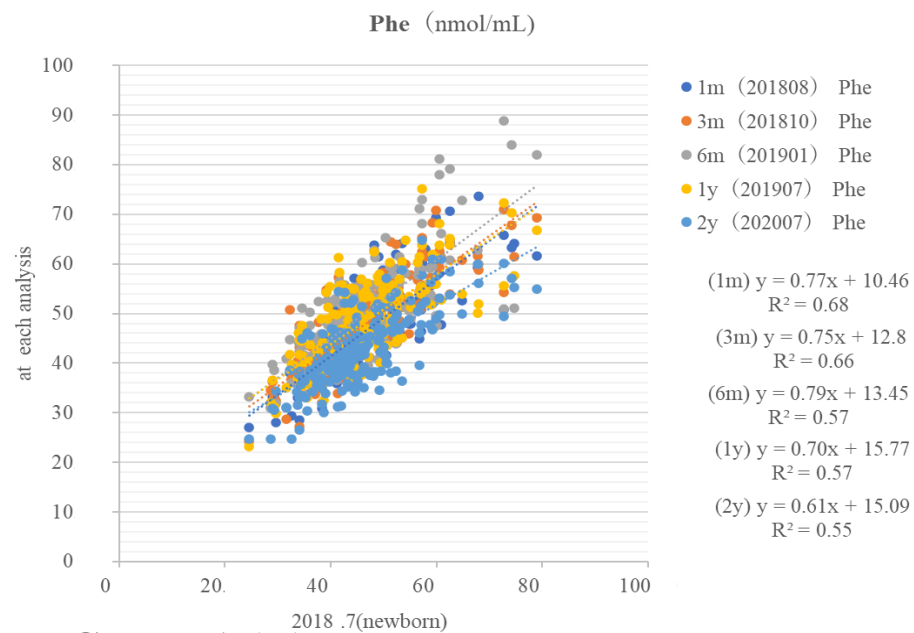

**SUPPLEMENTARY FIGURE 1 (B)**

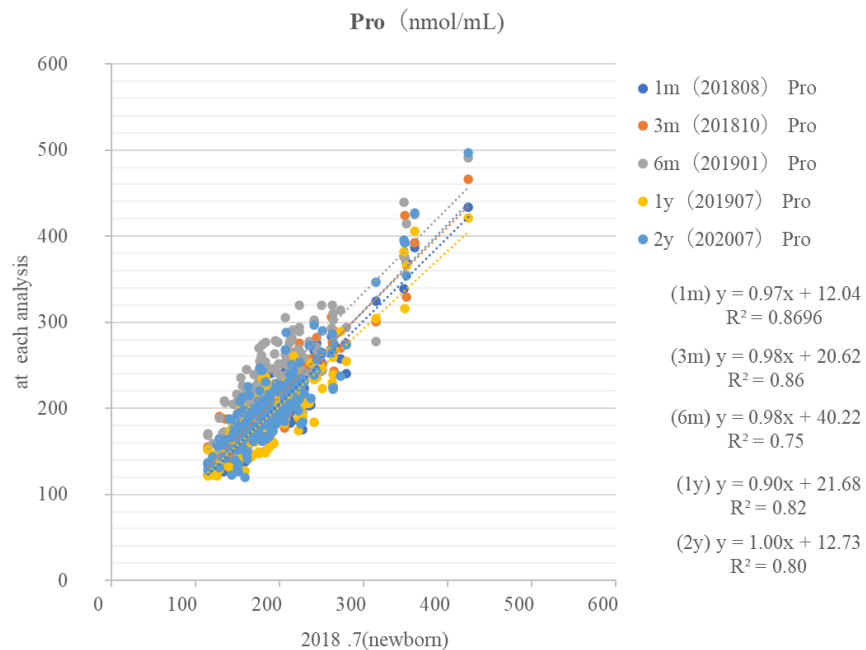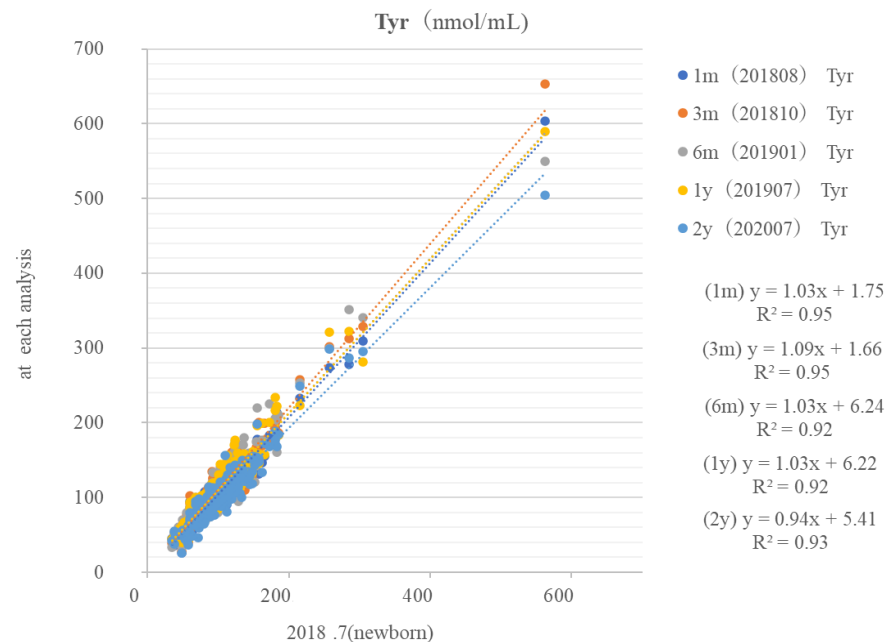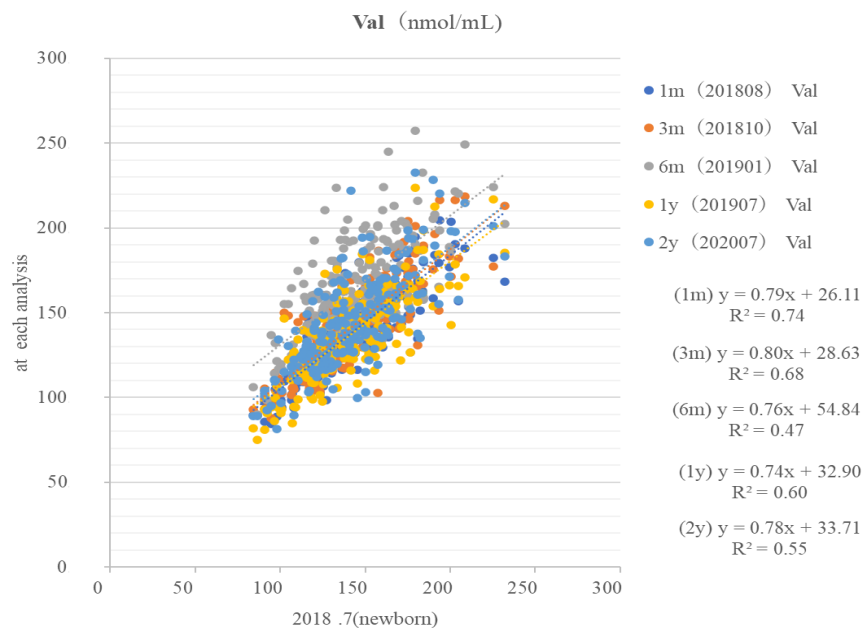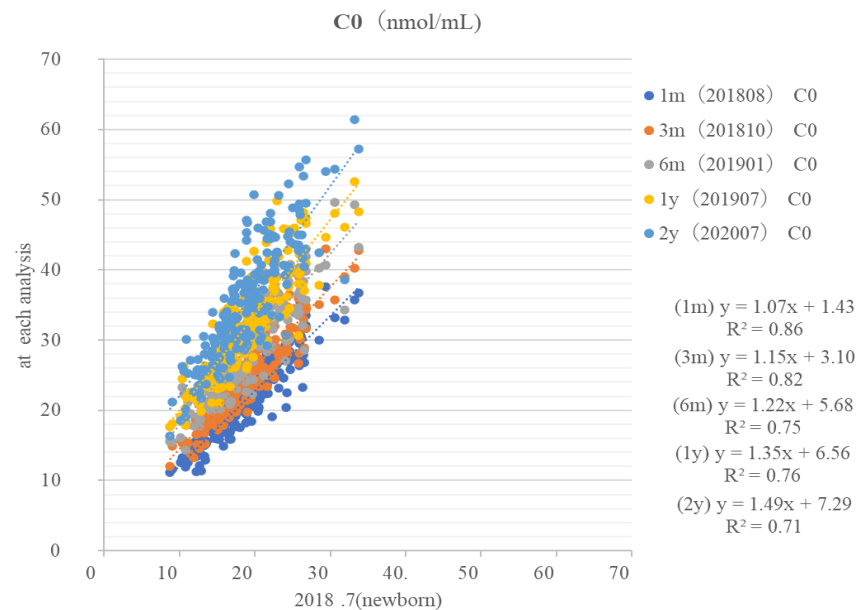

**SUPPLEMENTARY FIGURE 1 (C)**

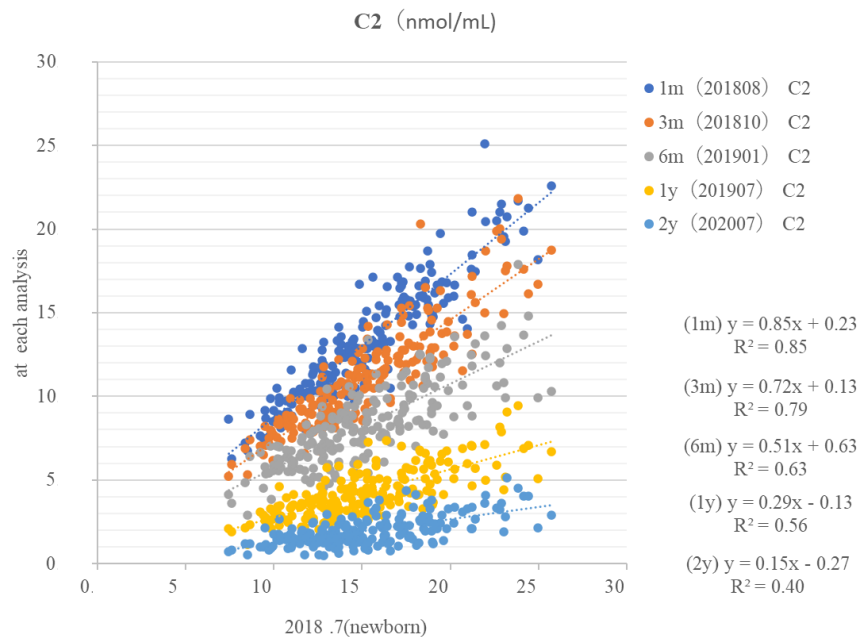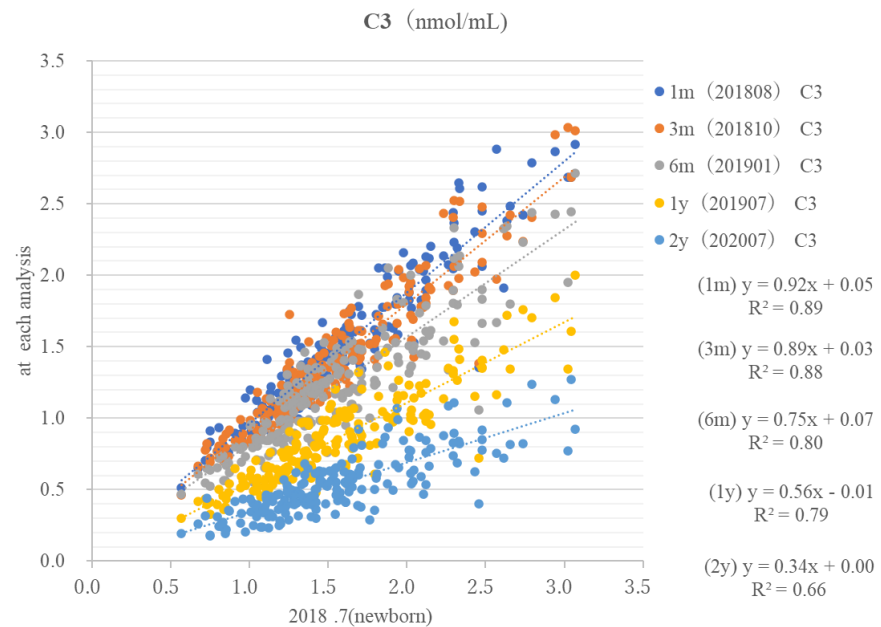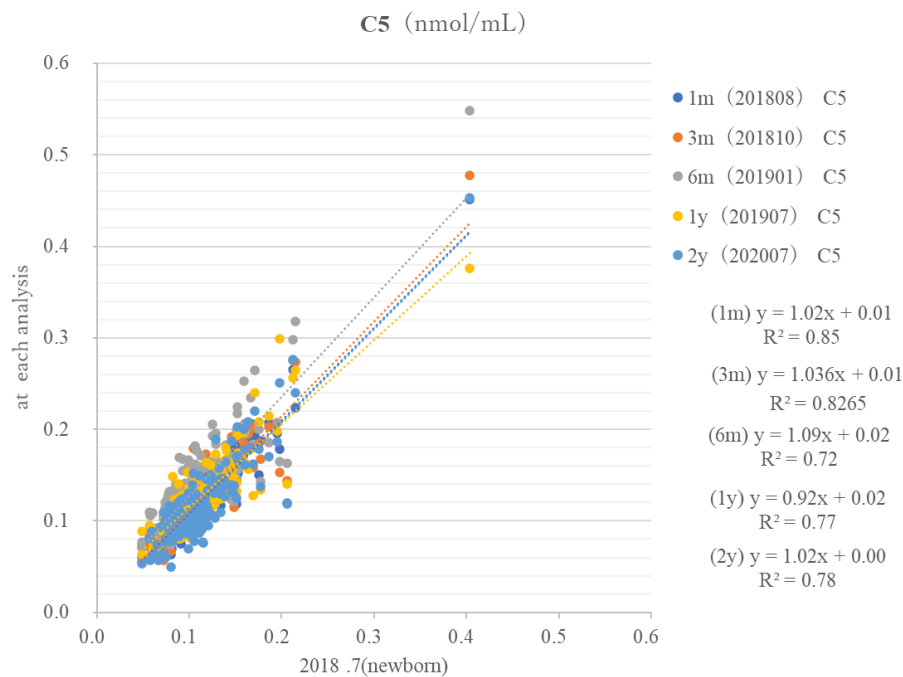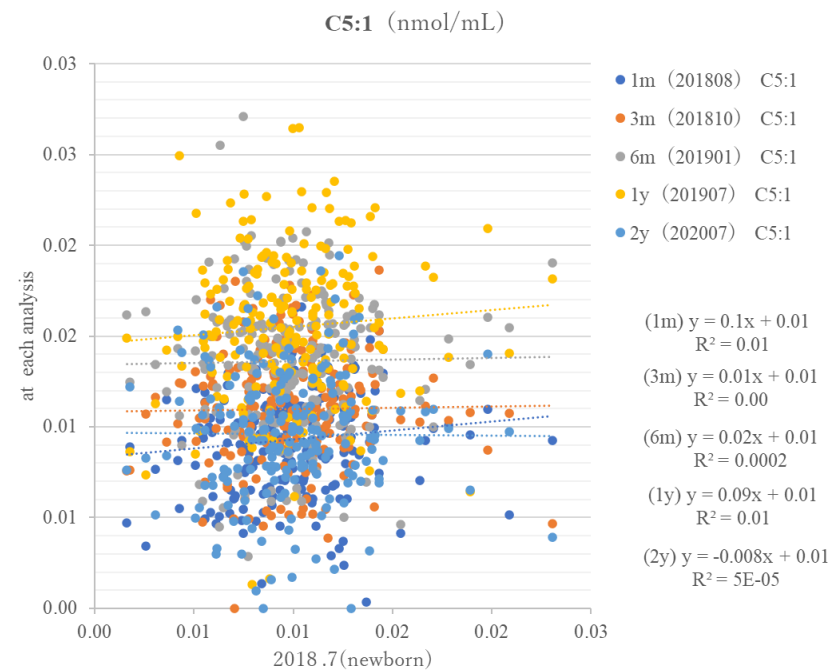

**SUPPLEMENTARY FIGURE 1 (D)**

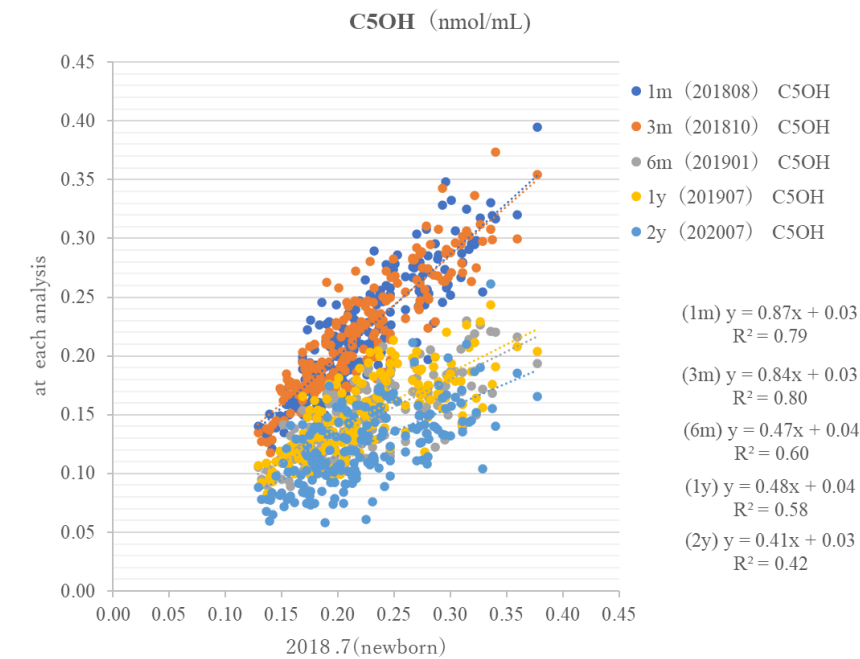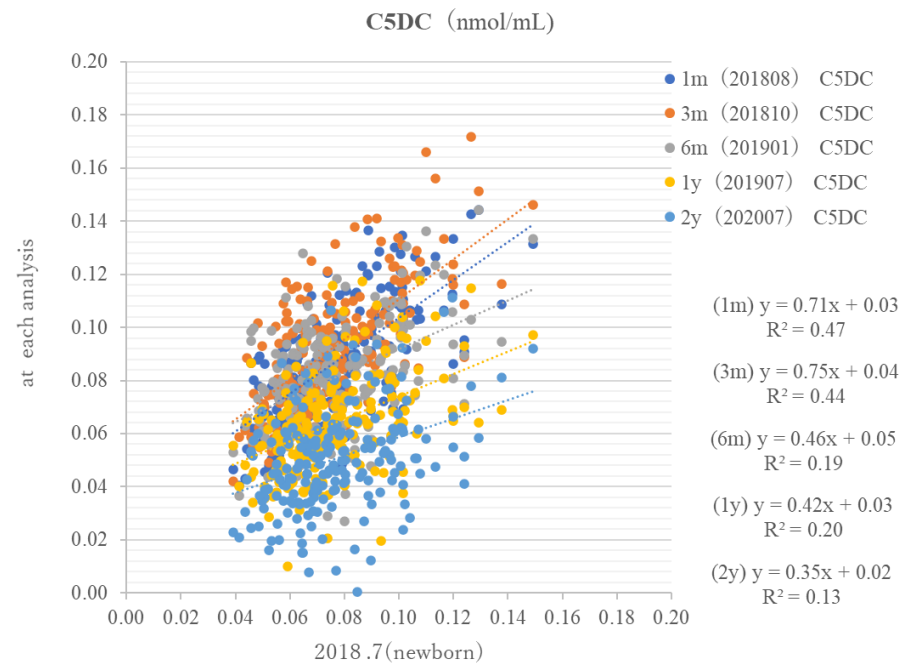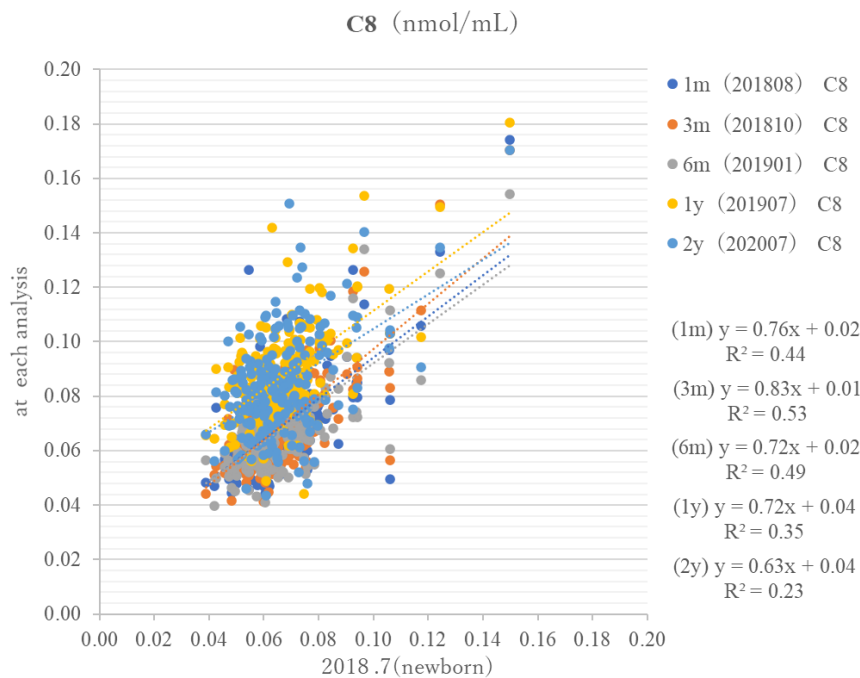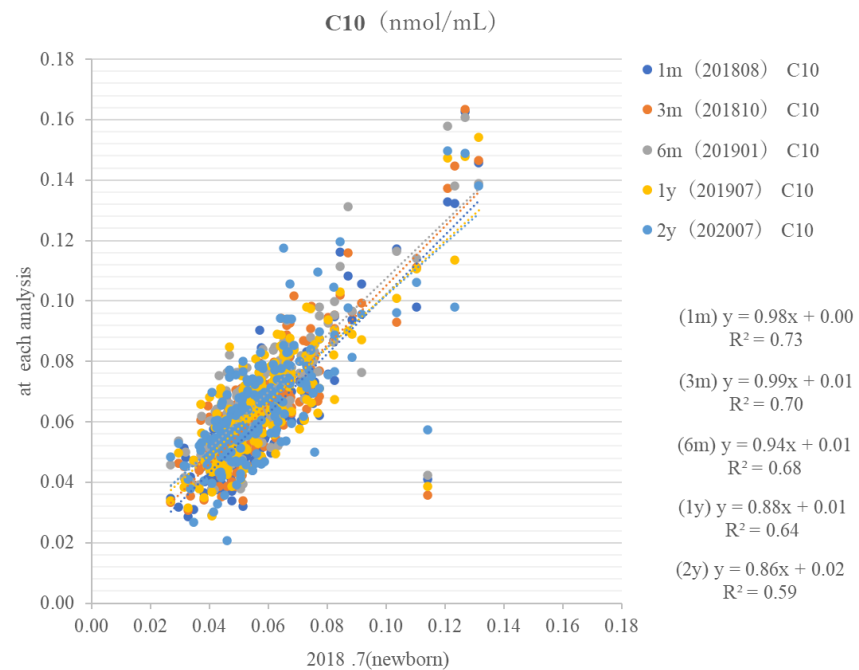

**SUPPLEMENTARY FIGURE 1 (E)**

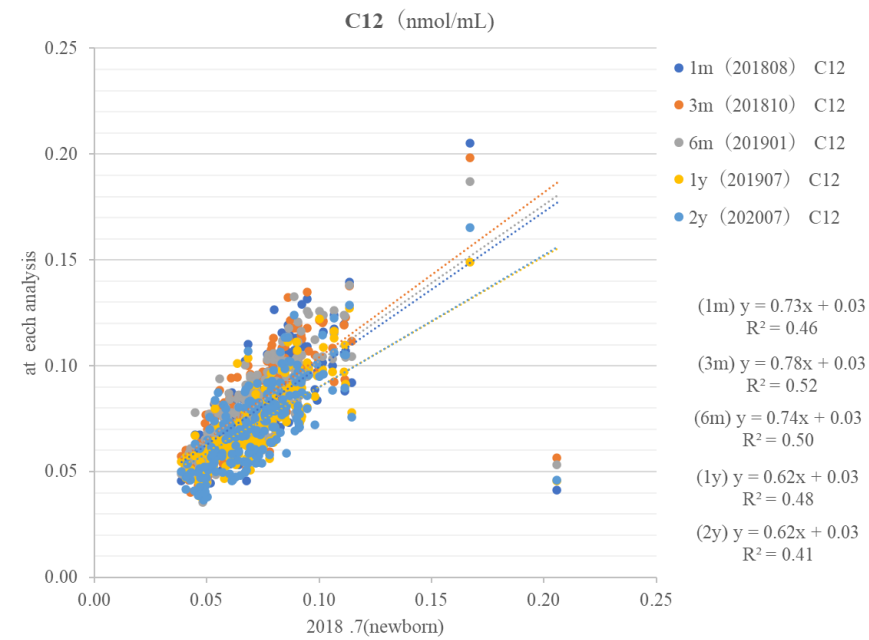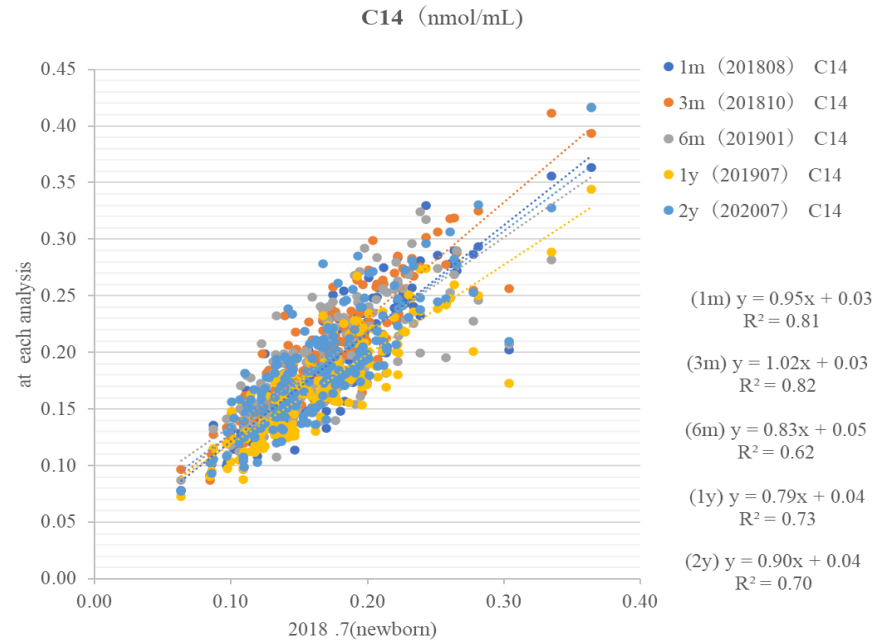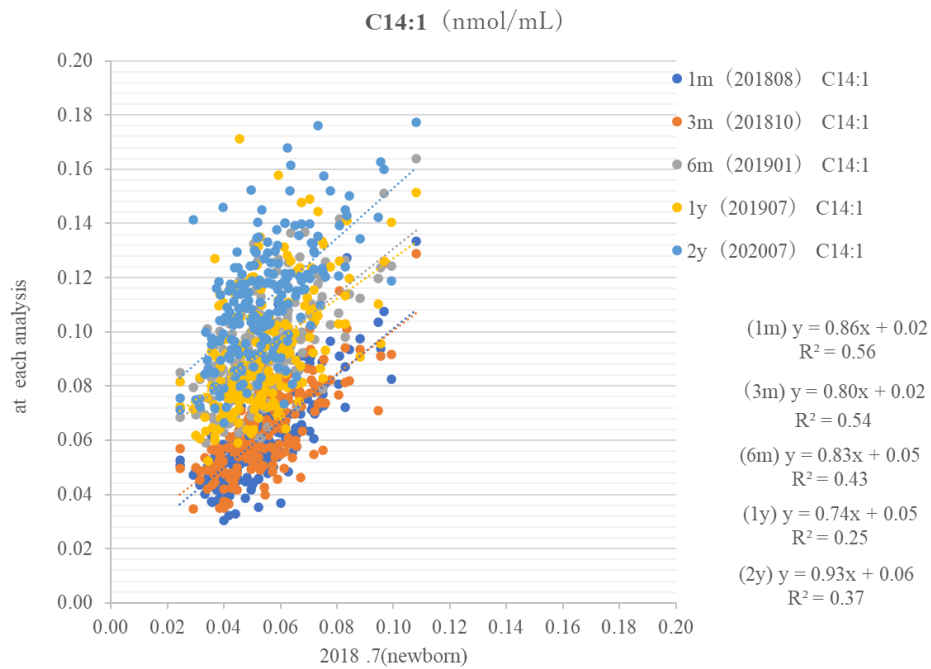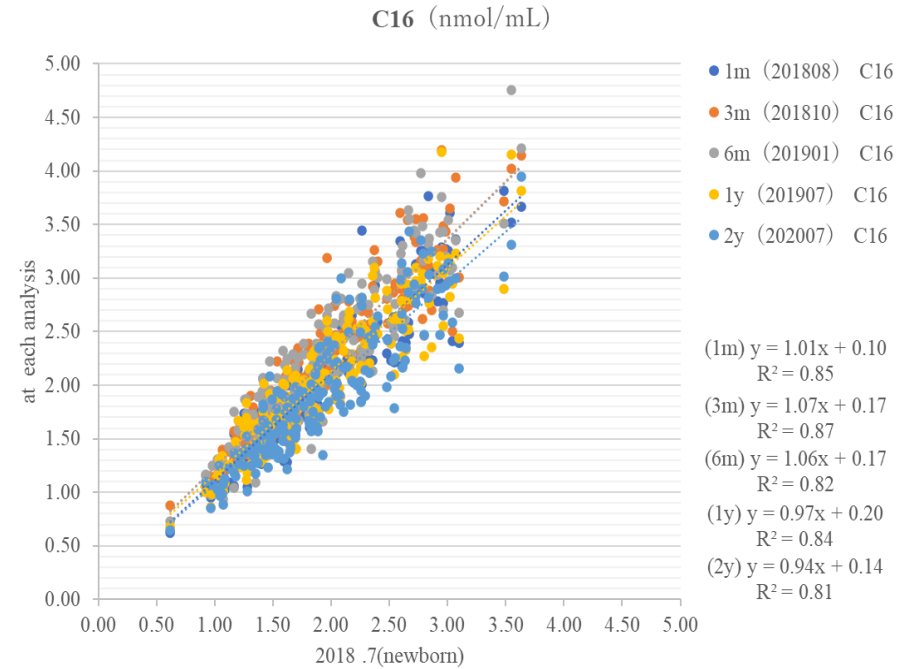

**SUPPLEMENTARY FIGURE 1 (F)**



**C16 OH (nmol/mL)**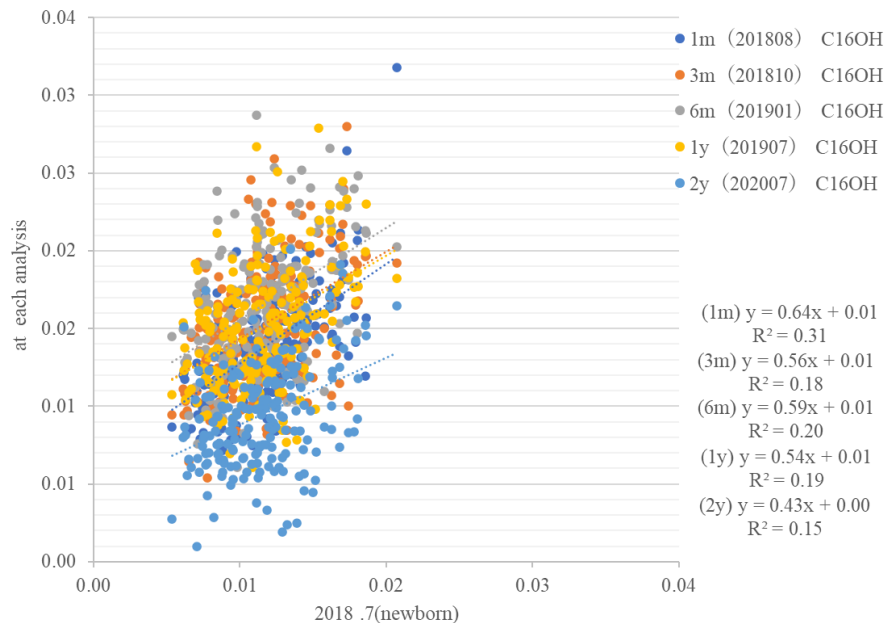**C18 (nmol/mL)**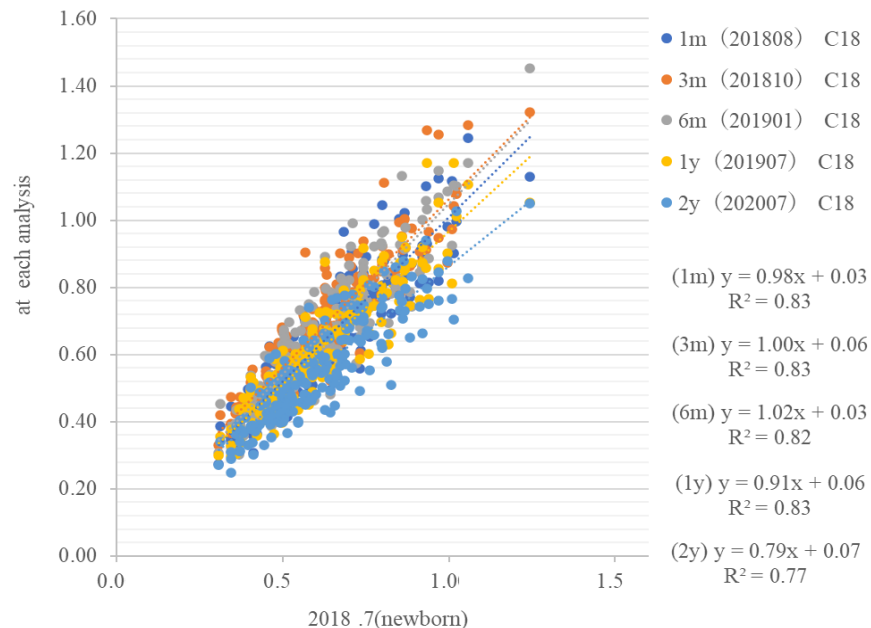**C18:1 (nmol/mL)**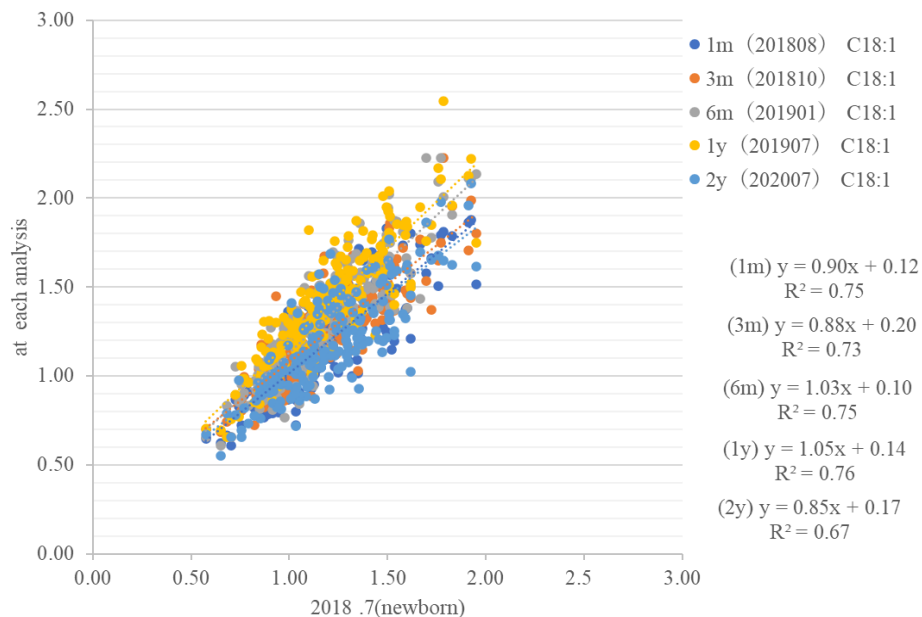**C18:1OH (nmol/mL)**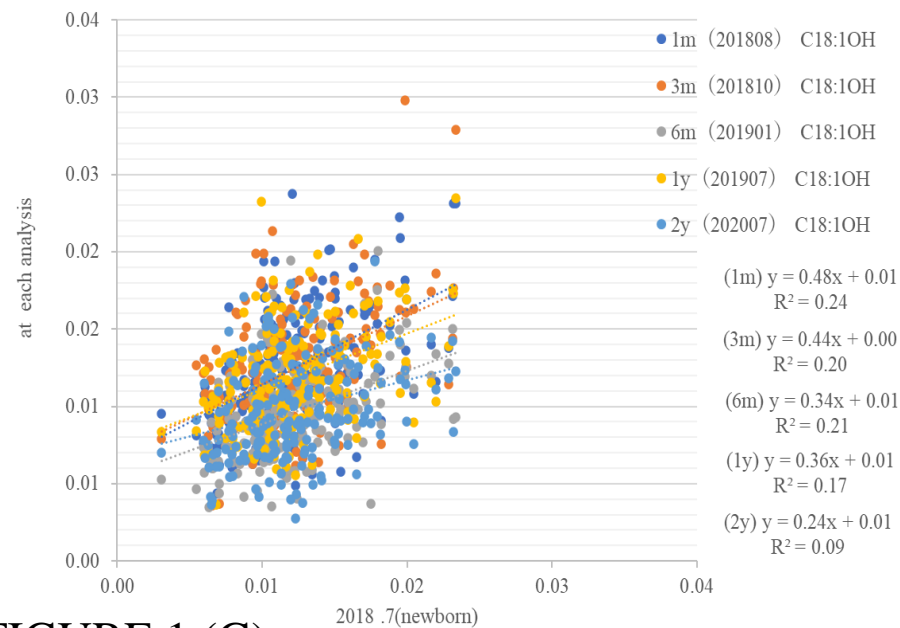

**C3/C2**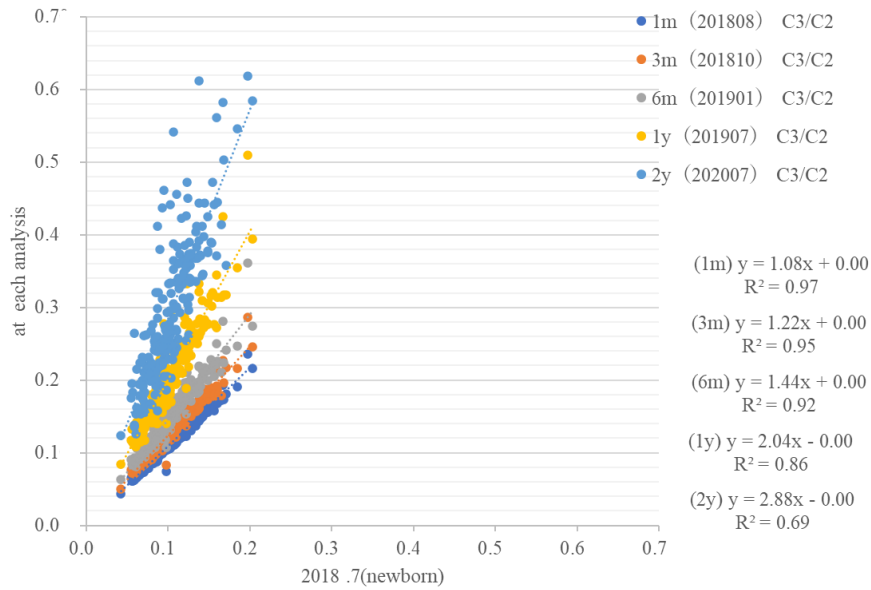**C0/(C16+C18)**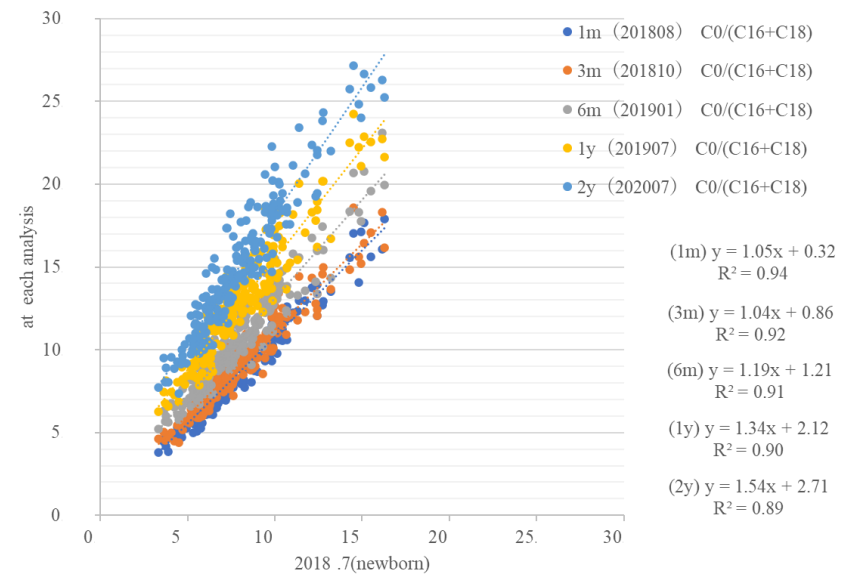**(C16+C18:1) /C2**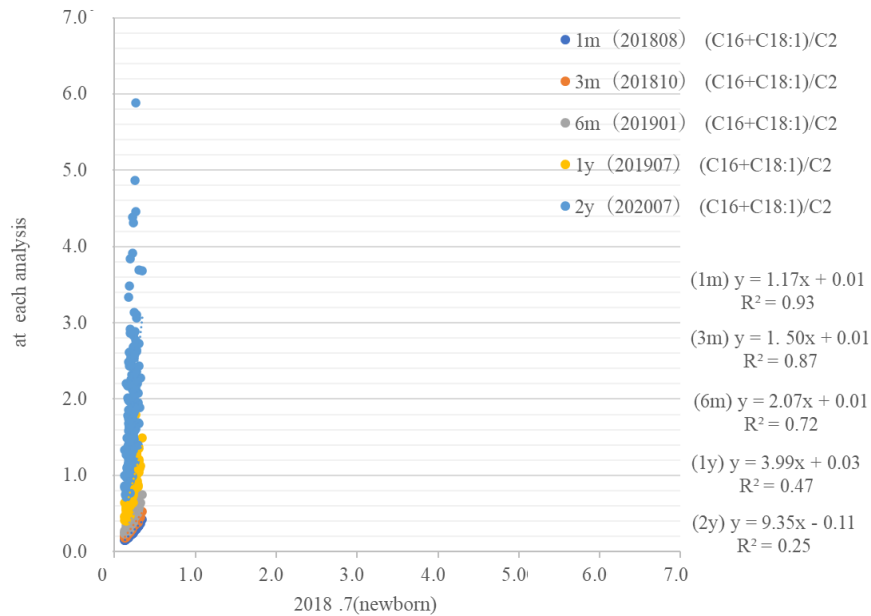**C14:1/C2**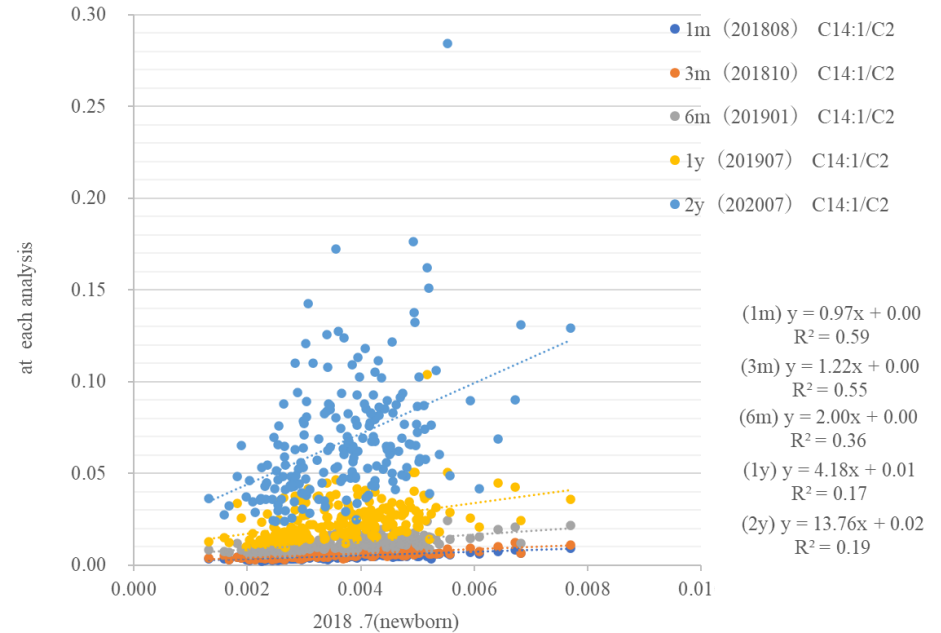



**C14:1/C2**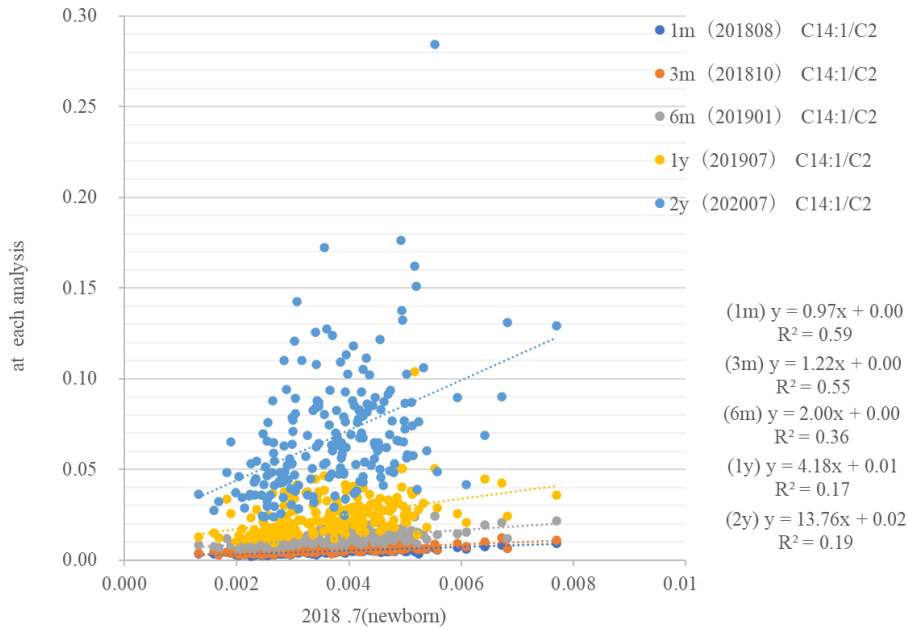**C8/C10**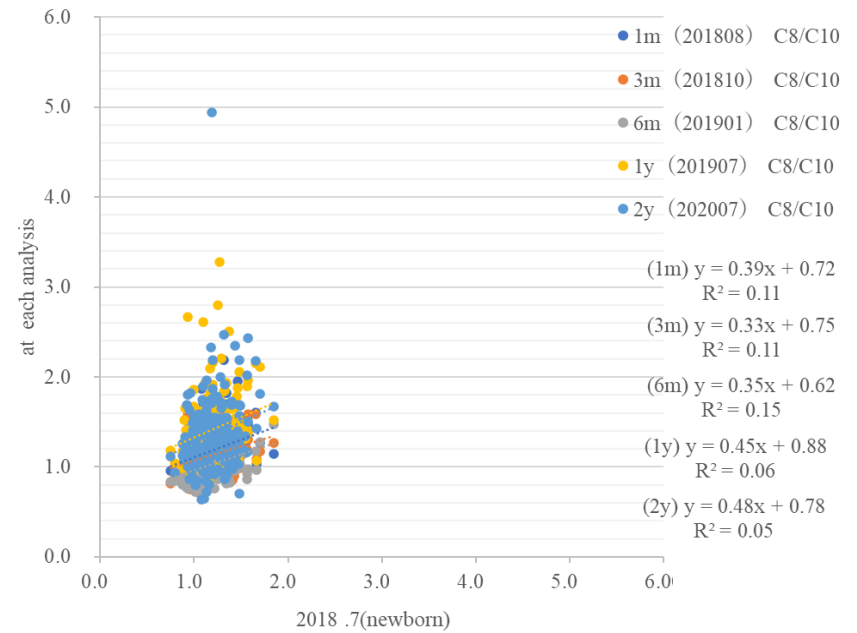**C4/C8**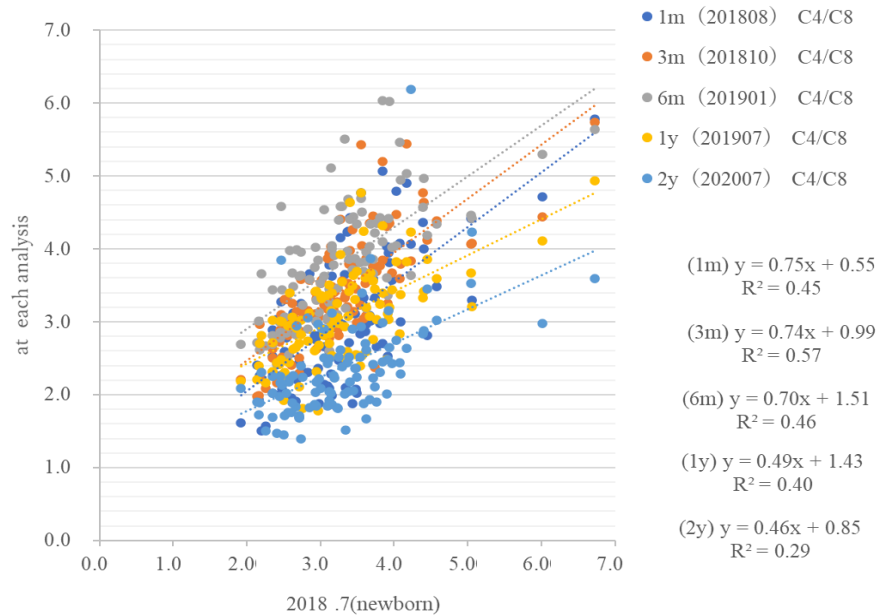**C14/C3(nmol/mL)**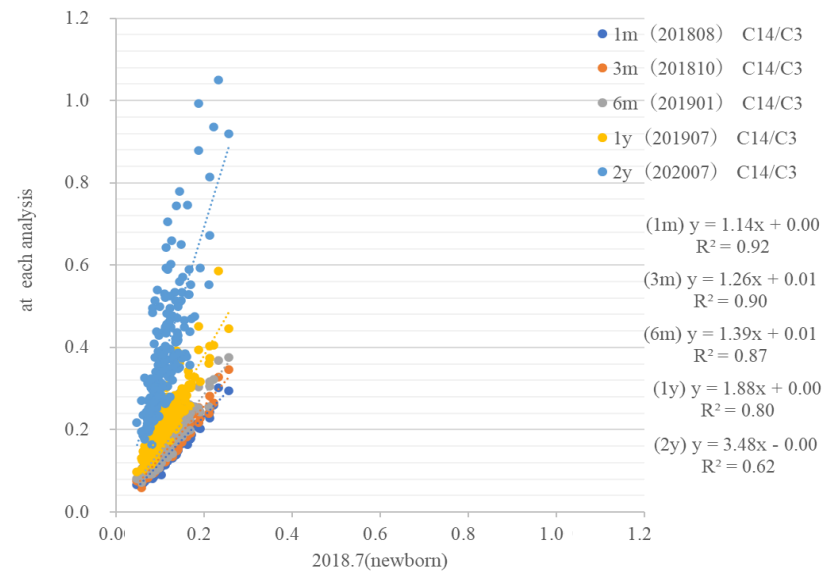

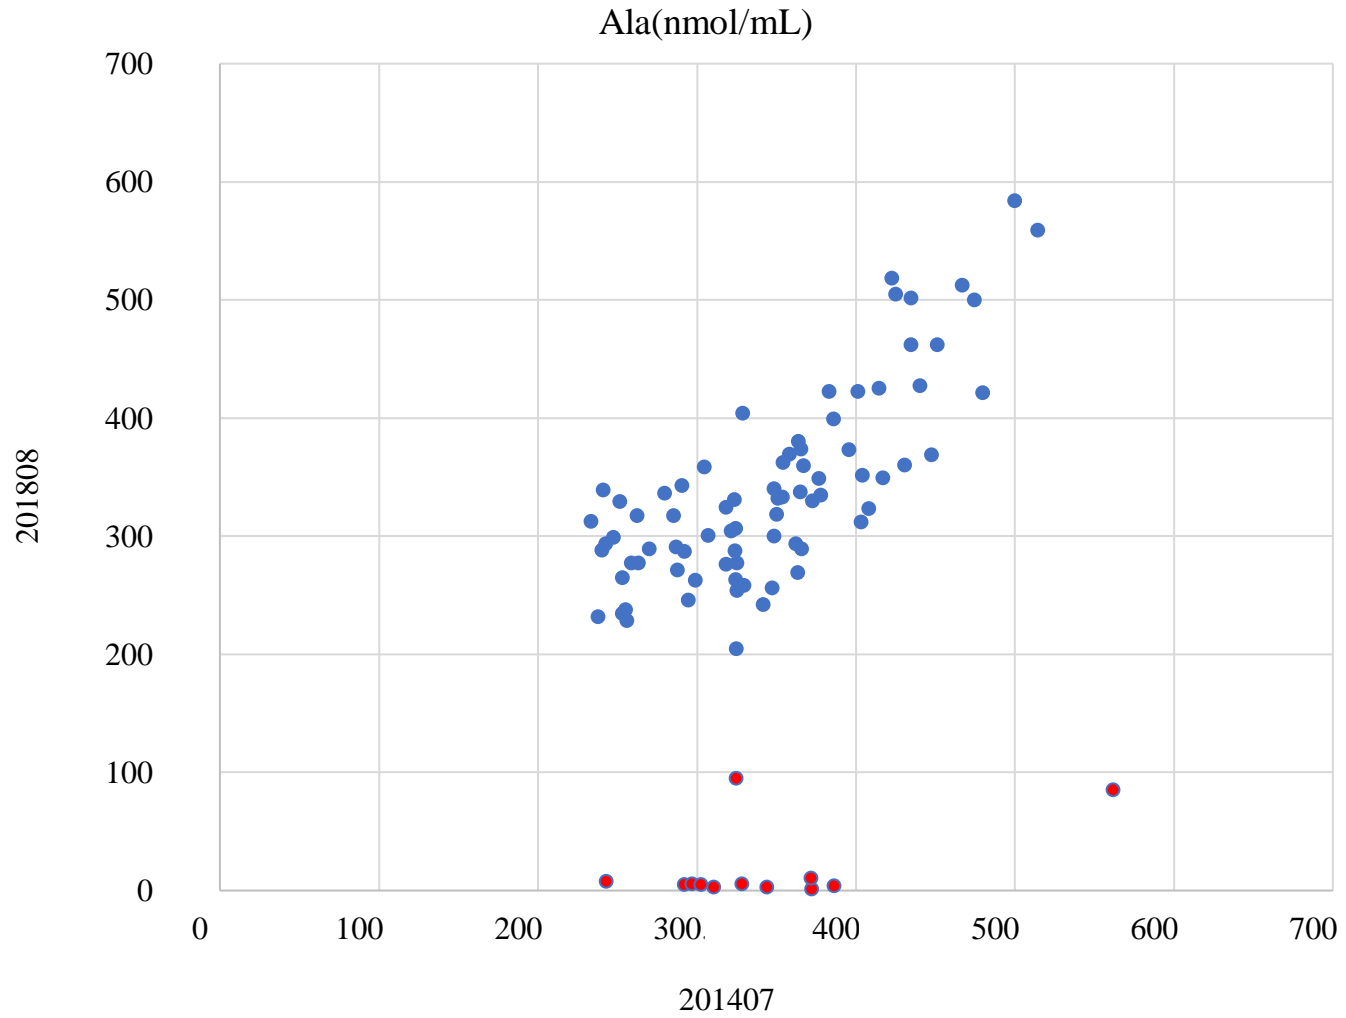

SUPPLEMENTARY FIGURE 2
